# Supplementary material for: The effects of genotypes and media composition on callogenesis, regeneration and cell suspension culture of chamomile (Matricaria chamomilla L.)
Source: PeerJ journal article supplement (doi:10.7717/peerj.11464), 2021-05-24
Supplement: peerj-56047-Supplemental_Files-Raw_Data.zip [file peerj-56047-Supplemental_Files-Raw_Data.zip]

## Sheet: Sheet2
Callogensis percentage and callus volume raw data
Factor	Levels	Callogenesis	Callus volume cm3
Genetype	Isfahan	78,23,45,6,7,5	16,7,1,0.8
Genetype	Kazeron	67,34,56,23,8	13,11,11,0
Genetype	Goral	64,5434,2,12,6	14,5,6,0
Genetype	Sharokashari	49,5.40,43,23,5	13,4,5,0,1
Genetype	Presso	43,43,13,35,23,6	11,6,3,1
Genetype	Shiraz	36,34,23,12,23,7	11,2,3,6
Explant	Leaf	66.95,34,23,45,23,5	11,4,3,6,
Explant	Shoot	50,23,13,24,50,4	14,11,2,3
Explant	Lateral sprouts	54,34,23,16,35,4	14,3,11,3
